# Supplementary material for: Conservation of two lineages of peroxisomal (Type I) 3-ketoacyl-CoA thiolases in land plants, specialization of the genes in Brassicaceae, and characterization of their expression in Arabidopsis thaliana
Source: PubMed Central journal article supplement — J Exp Bot. 2012 Oct 15;63(17):6093–103. doi: 10.1093/jxb/ers260 (PMC3481203; doi:10.1093/jxb/ers260), 2012-10-15
Supplement: supp_ers260_JXB_82362_Supp_Figs.pdf [file supp_ers260_JXB_82362_Supp_Figs.pdf]

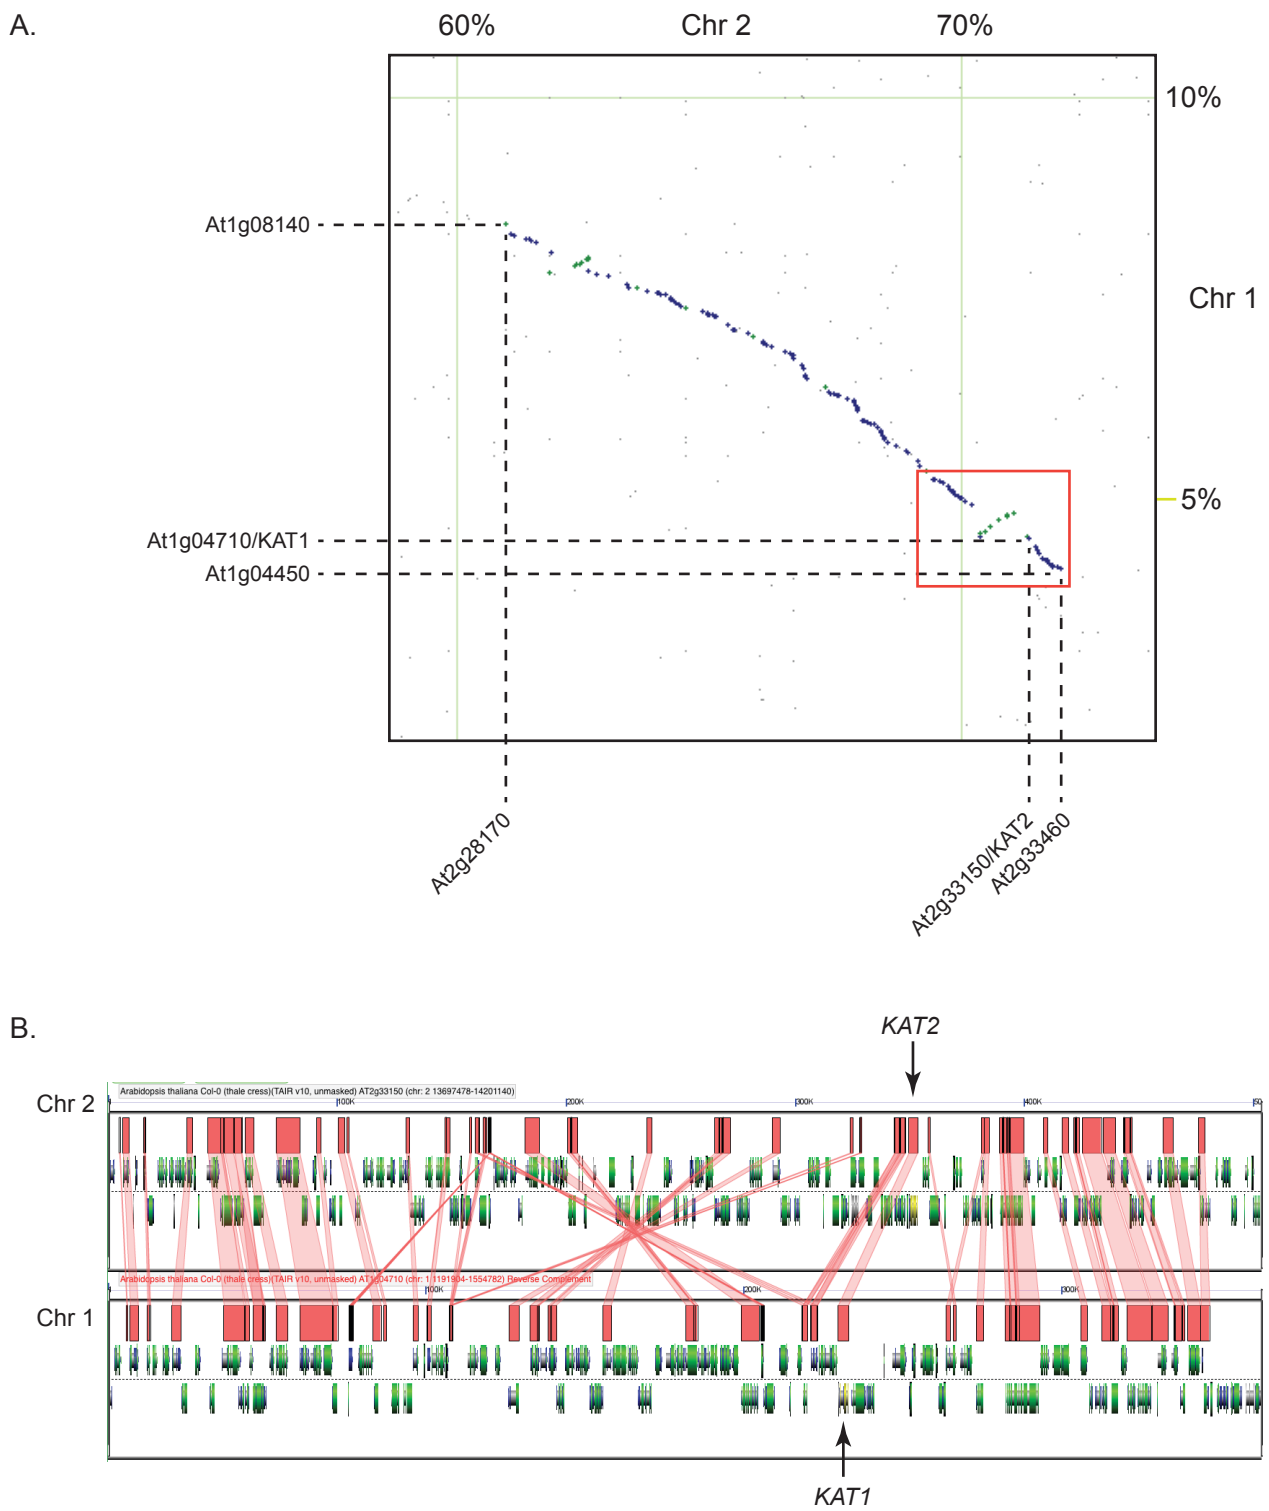

**Figure S1.** Synteny of *AtKAT2* and *AtKAT1* chromosomal regions.

(A) Synmap (<http://genomeevolution.org/CoGe/>) plot of the regions of chromosomes 2 (x-axis) and 1 (y-axis) containing *KAT2* and *KAT1* genes. Blue points represent duplicated genes running in opposite directions along the two chromosomes and green points genes running in the same direction with respect to standard chromosomal orientation (North to South). The percentage indicators correspond to the proportion of total chromosome physical length. *KAT* genes and genes at the extremities of the duplicated regions are indicated. The region in the red box is highlighted in detail in (b). For clarity, the reverse complement of chromosome 1 is depicted in (b).

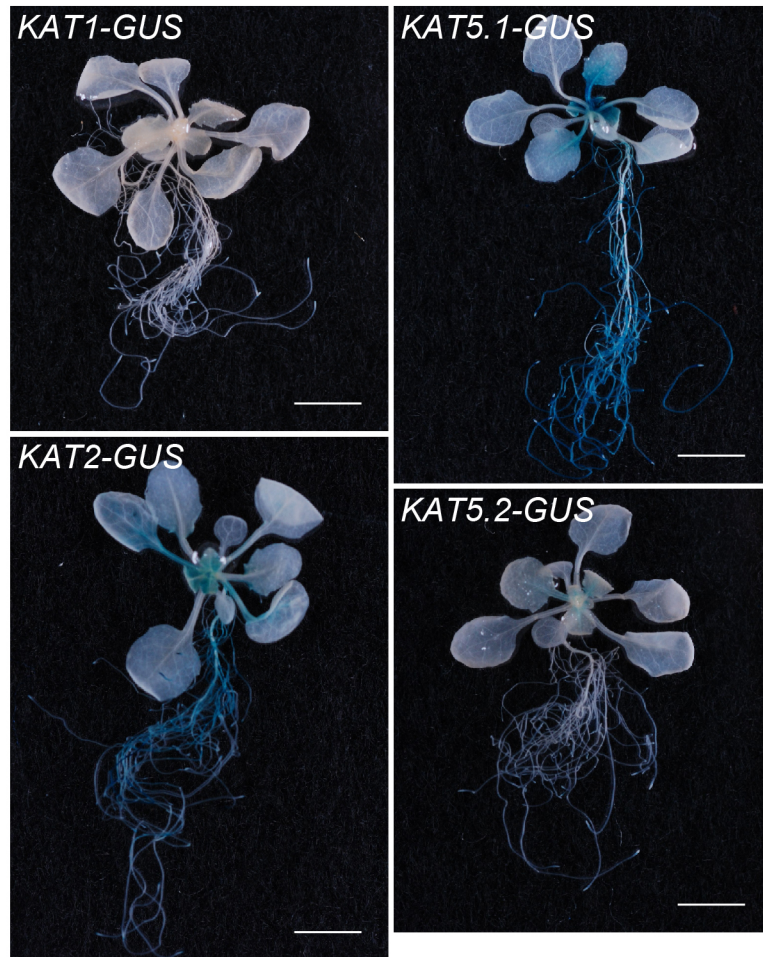

**Figure S2.** Activity of *KAT* promoter reporters visualised by GUS staining in 16 day old seedlings.

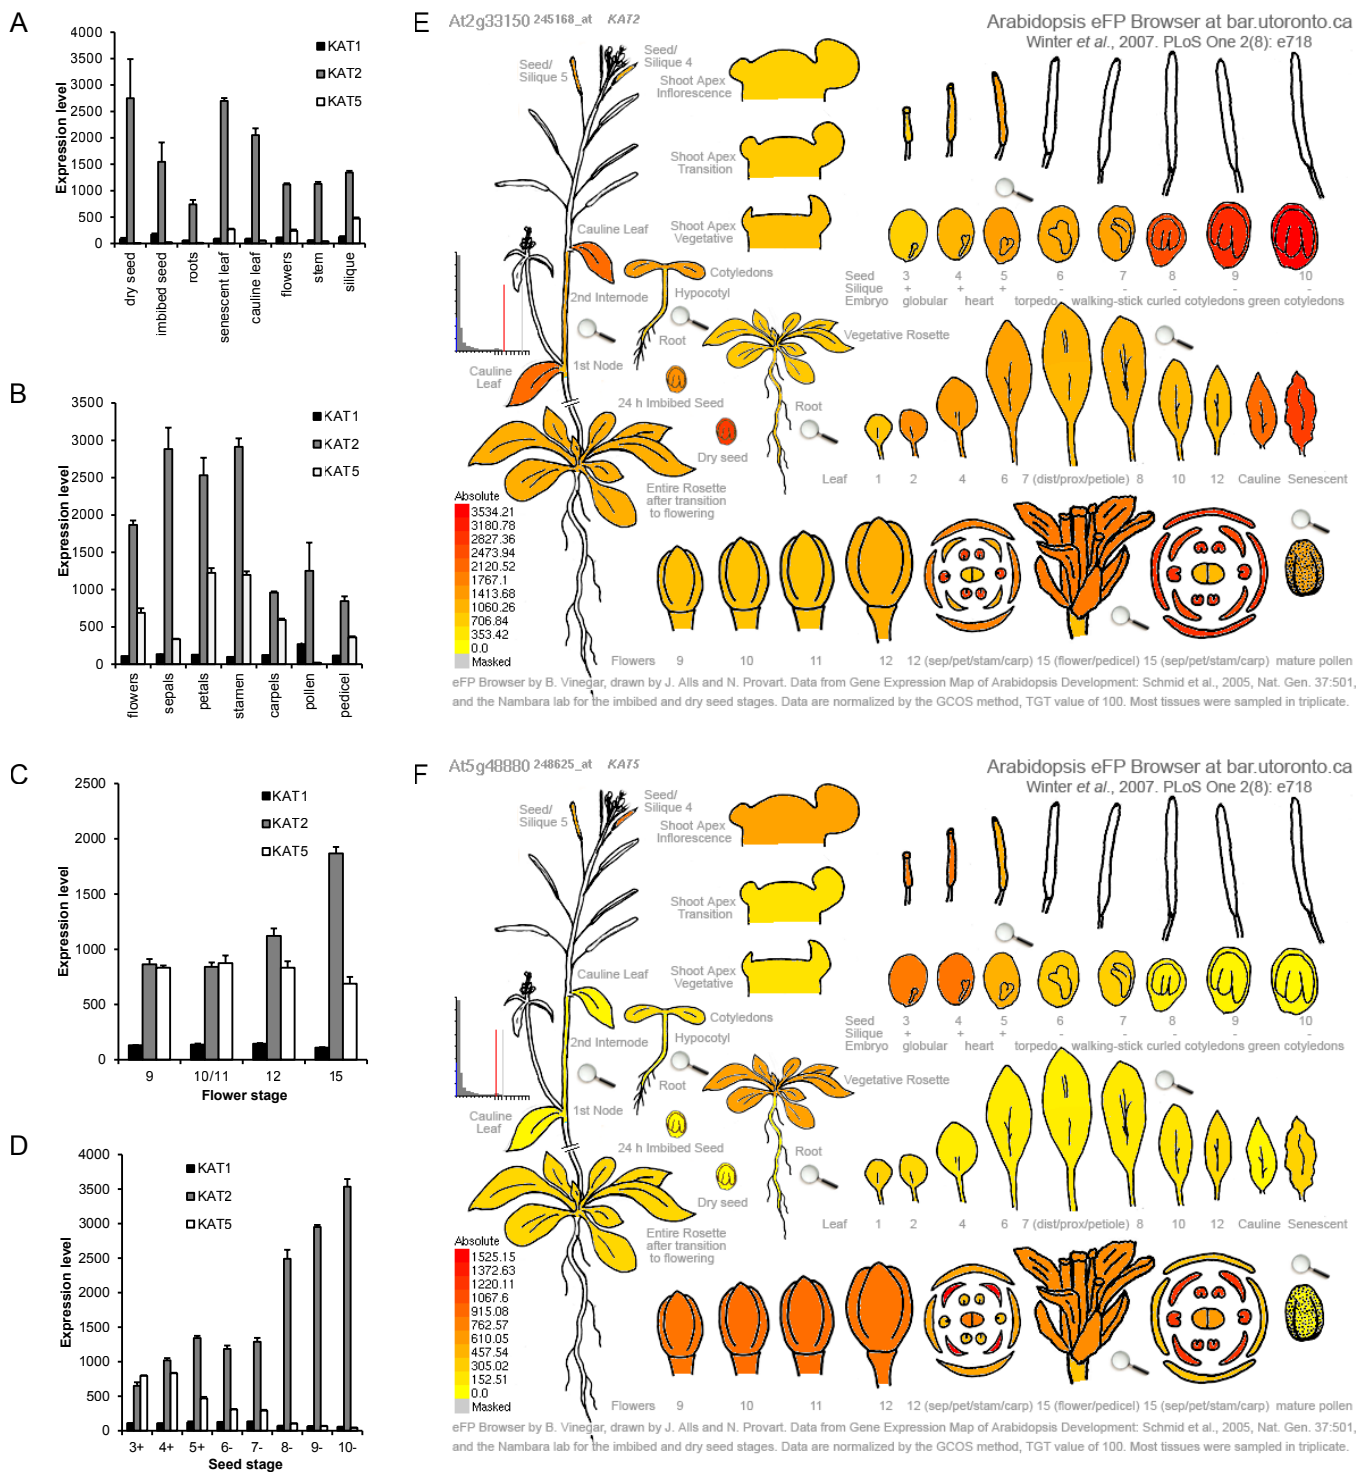

**Figure S3.** *KAT* transcript abundance in *Arabidopsis* tissues. Data were extracted from the Arabidopsis eFP browser (<http://bar.utoronto.ca/efp/cgi-bin/efpWeb.cgi>). See main text for description.
